# Supplementary material for: Egg-laying by female Aedes aegypti shapes the bacterial communities of breeding sites
Source: Springer Nature journal article supplement (doi:10.1186/s12915-023-01605-2), 2023-04-26
Supplement: MOESM1 [file 12915_2023_1605_MOESM1_ESM.pdf]

## Additional file 1

**Supplementary table 1.** Number of eggs laid by each individual *Aedes aegypti* female in treatment 5.

| Gravid females      | Number of eggs |
|---------------------|----------------|
| Female 1            | 3              |
| Female 2            | 59             |
| Female 3            | 78             |
| Female 4            | 33             |
| Female 5            | 90             |
| Female 6            | 30             |
| Female 7            | 53             |
| Female 8            | 84             |
| Female 7            | 53             |
| Female 8            | 84             |
| Female 9            | 4              |
| Female 10           | 78             |
| Mean number of eggs | 51.2           |
